# Supplementary material for: A Dual Role for SOX10 in the Maintenance of the Postnatal Melanocyte Lineage and the Differentiation of Melanocyte Stem Cell Progenitors
Source: PubMed Central journal article supplement (PMC3723529; doi:10.1371/journal.pgen.1003644), 2013-07-25
Supplement: pgen.1003644.s009.pdf [file pgen.1003644.s009.pdf]

**Supplemental Table 1. Quantitation of melanocyte immunolabeling during hair morphogenesis and hair cycling**

|                                      | KIT-          | KITlo          | KIThi           | MITF-          | MITF+          | TRP1-          | TRP1+           | TYR-           | TYR+           | SOX10-         | SOX10+          |
|--------------------------------------|---------------|----------------|-----------------|----------------|----------------|----------------|-----------------|----------------|----------------|----------------|-----------------|
| <b>P2 stage 4 morphogenetic hair</b> |               |                |                 |                |                |                |                 |                |                |                |                 |
| LPP                                  | 0.23% ± 0.39% | 7.14% ± 3.89%  | 92.64% ± 3.70%  | 1.49% ± 1.99%  | 98.51% ± 1.99% | 44.00% ± 4.00% | 56.00% ± 4.00%  | 62.33% ± 3.27% | 37.67% ± 3.27% | 2.65% ± 2.29%  | 97.35% ± 2.29%  |
| <b>P2 stage 6 morphogenetic hair</b> |               |                |                 |                |                |                |                 |                |                |                |                 |
| LPP                                  | 0.00% ± 0.00% | 14.05% ± 1.89% | 85.95% ± 1.89%  | 4.47% ± 1.77%  | 95.53% ± 1.77% | 64.55% ± 5.89% | 35.45% ± 5.89%  | 94.79% ± 1.51% | 5.21% ± 1.51%  | 3.96% ± 0.39%  | 96.04% ± 0.39%  |
| <b>p6 morphogenetic hair</b>         |               |                |                 |                |                |                |                 |                |                |                |                 |
| LPP                                  | 0.75% ± 0.78% | 28.49% ± 6.79% | 33.93% ± 6.26%  | 1.86% ± 1.94%  | 56.33% ± 7.35% | 50.51% ± 5.66% | 4.01% ± 1.39%   | 56.46% ± 9.44% | 1.14% ± 1.38%  | 0.79% ± 0.71%  | 65.05% ± 2.70%  |
| UTP                                  | 2.52% ± 2.01% | 22.49% ± 2.35% | 11.81% ± 2.24%  | 0.51% ± 0.44%  | 41.30% ± 5.62% | 36.89% ± 4.57% | 8.58% ± 2.69%   | 42.40% ± 8.07% | 0.00% ± 0.00%  | 0.46% ± 0.80%  | 33.70% ± 1.50%  |
| <b>p14 morphogenetic hair</b>        |               |                |                 |                |                |                |                 |                |                |                |                 |
| LPP                                  | 3.54% ± 2.70% | 36.72% ± 6.11% | 15.48% ± 2.31%  | 0.47% ± 0.67%  | 57.88% ± 4.86% | 45.38% ± 3.59% | 12.58% ± 2.70%  | 49.97% ± 6.74% | 1.21% ± 0.22%  | 4.16% ± 4.22%  | 49.53% ± 8.59%  |
| UTP                                  | 5.67% ± 1.02% | 32.58% ± 1.70% | 6.00% ± 1.41%   | 0.00% ± 0.00%  | 41.65% ± 5.53% | 13.20% ± 2.87% | 28.84% ± 2.53%  | 46.40% ± 6.07% | 2.42% ± 0.45%  | 2.14% ± 1.65%  | 44.17% ± 4.61%  |
| <b>7dpp (~adult anagen IV/V)</b>     |               |                |                 |                |                |                |                 |                |                |                |                 |
| LPP                                  | 0.00% ± 0.00% | 10.57% ± 5.31% | 64.55% ± 2.69%  | 10.30% ± 5.45% | 54.07% ± 5.48% | 38.27% ± 4.25% | 43.27% ± 7.22%  | 49.97% ± 6.74% | 1.21% ± 0.22%  | 10.99% ± 7.84% | 65.59% ± 3.59%  |
| UTP                                  | 0.00% ± 0.00% | 4.30% ± 3.50%  | 20.57% ± 4.01%  | 4.52% ± 0.99%  | 31.11% ± 0.96% | 4.08% ± 1.49%  | 14.38% ± 6.84%  | 46.40% ± 6.07% | 2.42% ± 0.45%  | 2.40% ± 0.10%  | 21.02% ± 9.84%  |
| <b>21dpp (~adult catagen VII)</b>    |               |                |                 |                |                |                |                 |                |                |                |                 |
| Bulge                                | 0.74% ± 0.69% | 16.68% ± 2.44% | 36.92% ± 3.27%  | 49.41% ± 9.52% | 4.77% ± 1.85%  | 25.74% ± 6.02% | 14.21% ± 3.03%  | 39.51% ± 9.85% | 0.00% ± 0.00%  | 1.78% ± 2.08%  | 56.34% ± 17.08% |
| SHG                                  | 2.26% ± 1.96% | 11.48% ± 4.67% | 31.91% ± 11.91% | 34.72% ± 8.20% | 11.10% ± 5.42% | 16.39% ± 5.54% | 43.65% ± 11.88% | 58.73% ± 8.20% | 1.75% ± 2.42%  | 2.17% ± 0.78%  | 39.71% ± 15.56% |

\*compared to KIT
